# Supplementary material
Source: PubMed Central journal article supplement (PMC2966106)
Supplement: supp_M110.165902_Supplemental.pdf [file supp_M110.165902_Supplemental.pdf]

Supplemental Figures:

S1

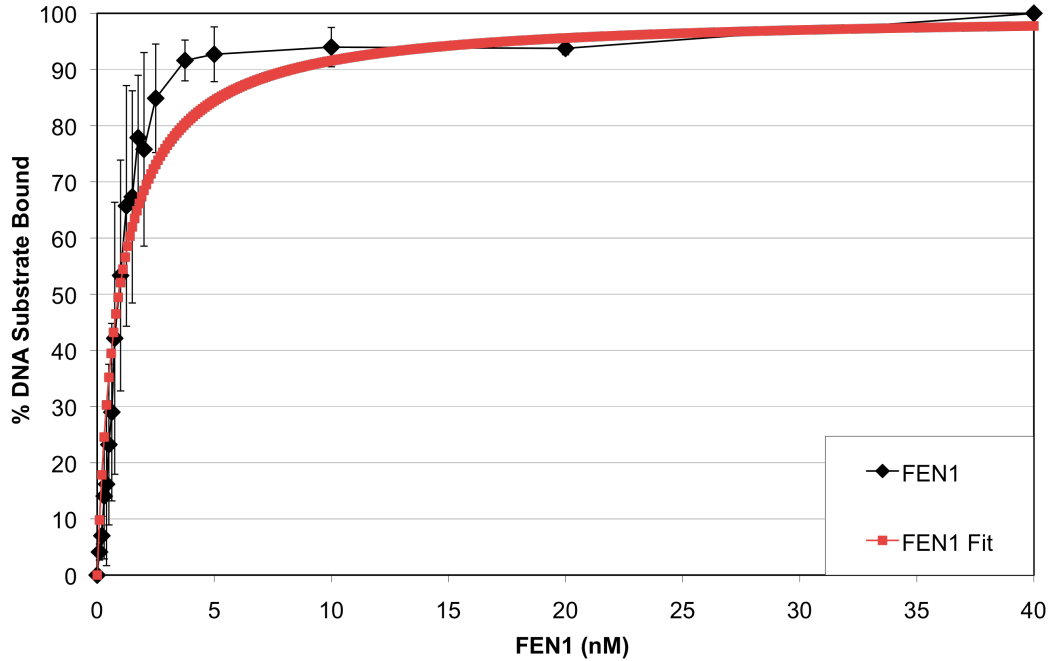

**FIGURE S1: *FEN1* binding to a 53 nt 5' flap with fit:** *FEN1* binding was measured by EMSA as described in the Experimental Procedures section. Reactions were initiated by incubating increasing concentrations of *FEN1* (0.10, 0.20, 0.30, 0.40, 0.50, 0.63, 0.75, 1.00, 1.25, 1.50, 1.75, 2.00, 2.50, 3.75, 5.00, 10.00, 20.00, 40.00 nM) with the 53 nt flap substrate (U1:T1:D1.53B) for 10 minutes at 37 °C. The *FEN1* binding line (represented by the diamond) shows the graphical quantitation of DNA substrate bound by *FEN1* with error bars for at least three independent EMSA results. The *FEN1* Fit line (represented by the red line) represents the fit to the hyperbolic equation 1 defined in the Experimental Procedures section.

S2

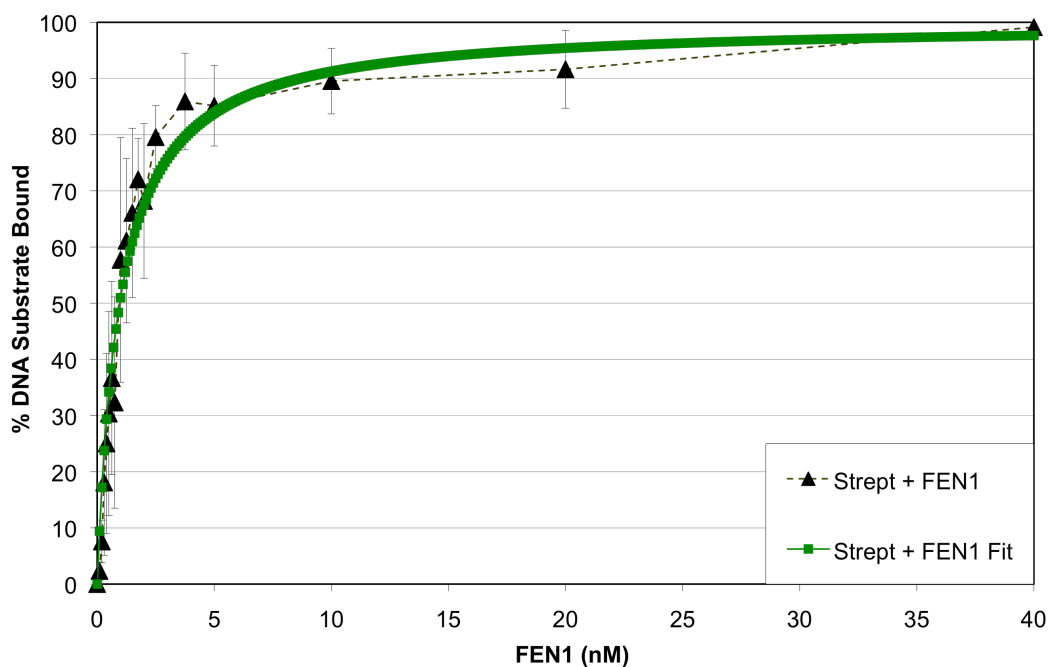

**FIGURE S2: *FEN1* binding to a streptavidin pre-blocked 53 nt 5' flap with fit:** *FEN1* binding was measured by EMSA as described in the Experimental Procedures section. Reactions were initiated by incubating increasing concentrations of *FEN1* (0.10, 0.20, 0.30, 0.40, 0.50, 0.63, 0.75, 1.00, 1.25, 1.50, 1.75, 2.00, 2.50, 3.75, 5.00, 10.00, 20.00, 40.00 nM) with the 53 nt flap substrate (U1:T1:D1.53B) for 10 minutes at 37 °C. The Strept + *FEN1* binding line (represented by the triangle) shows the graphical quantitation of streptavidin pre-blocked DNA substrate bound by *FEN1* with error bars for at least three independent EMSA results. The Strept + *FEN1* Fit line (represented by the green line) represents the fit to the hyperbolic equation 1 defined in the Experimental Procedures section.

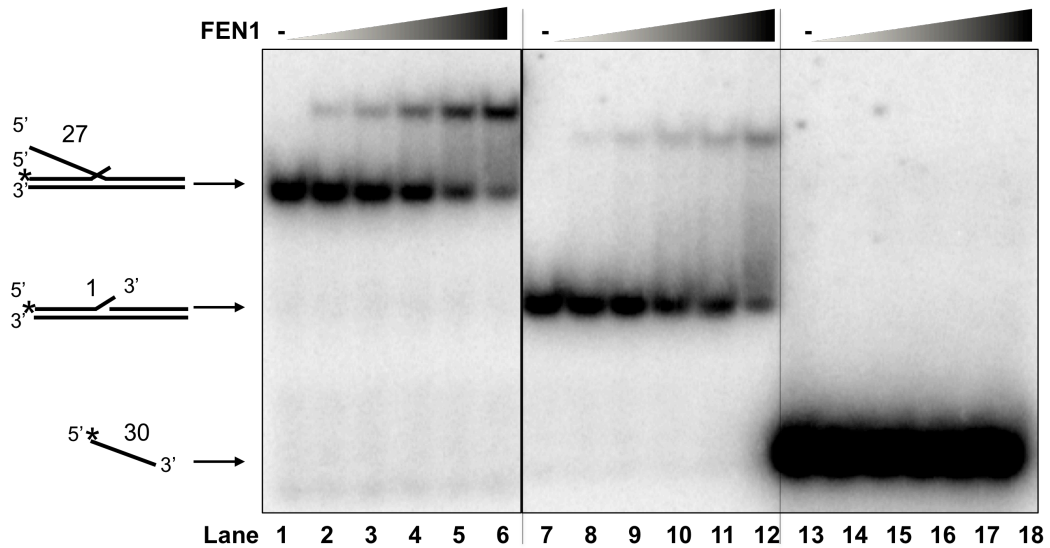

**FIGURE S3: *FEN1* preferentially binds the double flap substrate.** *FEN1* binding was measured by EMSA as described in the Experimental Procedures section. Reactions were initiated by incubating increasing concentrations of *FEN1* (as noted in Figure 3A) with the experimental substrates for 10 minutes. The gel shows *FEN1* bound to a 27 nt double flap substrate (U2:T2:D2.27) in lanes 1 - 6, an upstream 1 nt 3' flap with no downstream 5' flap substrate (U2:T2:D0) in lanes 7 - 12, and a 30 nt ssDNA segment (D2.F) in lanes 13 - 18. The substrate configurations and label location are indicated to the left of the figure.

S4

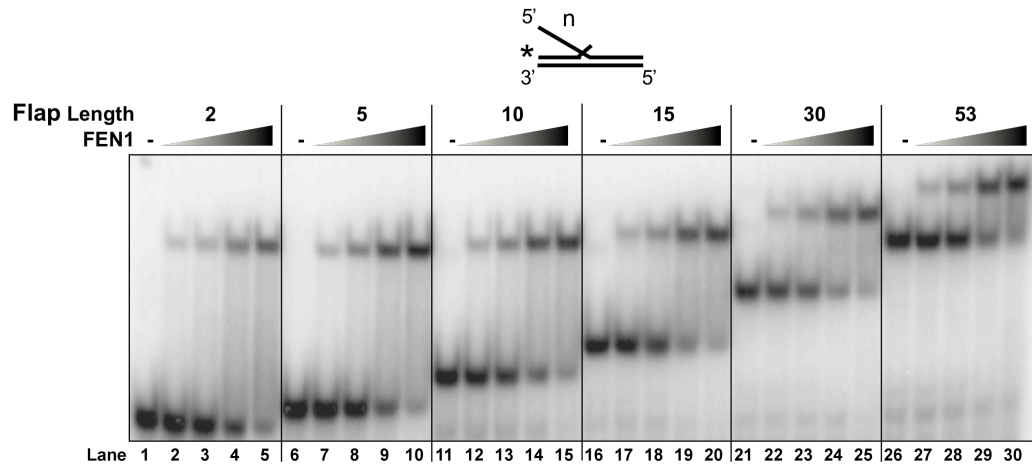

**FIGURE S4: Long 5' flaps provide additional FEN1 binding affinity relative to a short flap.** FEN1 binding was measured by EMSA as described in the Experimental Procedures section. Reactions were initiated by incubating increasing concentrations of FEN1 (as noted in Figure 3B) with the experimental substrates for 10 minutes. The gel shows FEN1 bound to substrates with varying 5' downstream flap lengths of 2 nt (U1:T1:D1.2) in lanes 1 - 5, 5 nt (U1:T1:D1.5) in lanes 6 - 10, 10 nt (U1:T1:D1.10) in lanes 11 - 15, 15 nt (U1:T1:D1.15) in lanes 16 - 20, 30 nt (U1:T1:D1.30) in lanes 21 - 25, and 53 nt (U1:T1:D1.53) in lanes 26 - 30. The substrate configuration is indicated above the gel where "n" represents the length of the 5' flap listed.

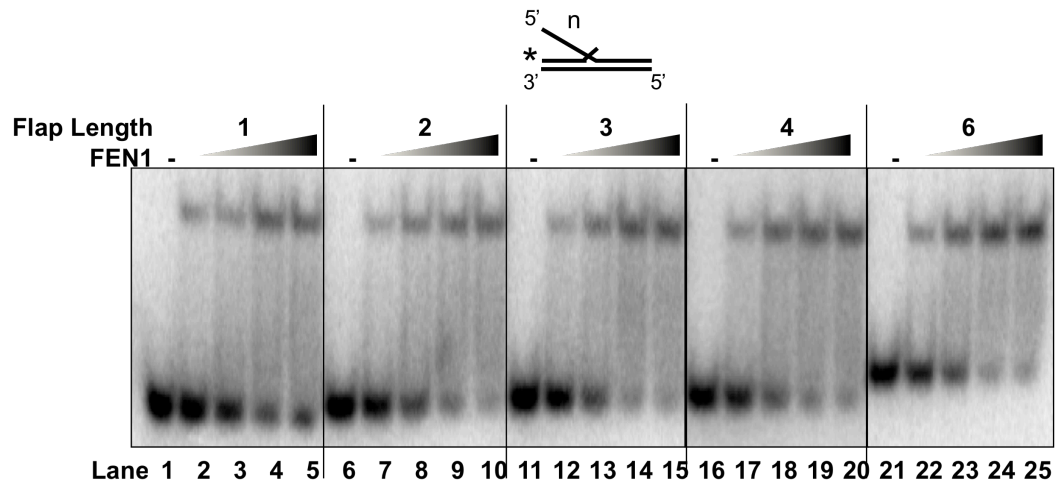

**FIGURE S5: *FEN1* binding affinity on short flaps increases with flap length.** *FEN1* binding was measured by EMSA as described in the Experimental Procedures section. Reactions were initiated by incubating increasing concentrations of *FEN1* (as noted in Figure 3C) with the experimental substrates for 10 minutes. The gel shows *FEN1* bound to substrates with varying 5' downstream flap lengths of 1 nt (U3:T3:D3.1) in lanes 1 - 5, 2 nt (U3:T3:D3.2) in lanes 6 - 10, 3 nt (U3:T3:D3.3) in lanes 11 - 15, 4 nt (U3:T3:D3.4) in lanes 16 - 20, and 6 nt (U3:T3:D3.6) in lanes 21 - 25. The substrate configuration is indicated above of the gel where “n” represents the length of the 5' flap listed.
